# Supplementary material for: The Role of China in the Global Spread of the Current Cholera Pandemic
Source: PLOS journal article supplement (doi:10.1371/journal.pgen.1005072), 2015-03-13

|                             |                                                                                                                                                                                                                                                                                                                                                                          |
|-----------------------------|--------------------------------------------------------------------------------------------------------------------------------------------------------------------------------------------------------------------------------------------------------------------------------------------------------------------------------------------------------------------------|
| Title                       | The role of China in the global spread of the current cholera pandemic                                                                                                                                                                                                                                                                                                   |
| Authors                     | Didelot, Xavier;Pang, Bo;Zhou, Zhemin;McCann, Angela;Ni, Peixiang;Li, Dongfang;Achtman, Mark;Kan, Biao                                                                                                                                                                                                                                                                   |
| Publication date            | 2015                                                                                                                                                                                                                                                                                                                                                                     |
| Original Citation           | Didelot X, Pang B, Zhou Z, McCann A, Ni P, Li D, et al. (2015) The Role of China in the Global Spread of the Current Cholera Pandemic. PLoS Genet 11(3): e1005072. doi:10.1371/journal.pgen.1005072                                                                                                                                                                      |
| Type of publication         | Article (peer-reviewed)                                                                                                                                                                                                                                                                                                                                                  |
| Link to publisher's version | 10.1371/journal.pgen.1005072                                                                                                                                                                                                                                                                                                                                             |
| Rights                      | © 2015 Didelot et al. This is an open access article distributed under the terms of the Creative Commons Attribution License, which permits unrestricted use, distribution, and reproduction in any medium, provided the original author and source are credited - <a href="http://creativecommons.org/licenses/by/4.0/">http://creativecommons.org/licenses/by/4.0/</a> |
| Download date               | 2024-09-22 17:52:45                                                                                                                                                                                                                                                                                                                                                      |
| Item downloaded from        | <a href="https://hdl.handle.net/10468/2316">https://hdl.handle.net/10468/2316</a>                                                                                                                                                                                                                                                                                        |

Branches of normal length

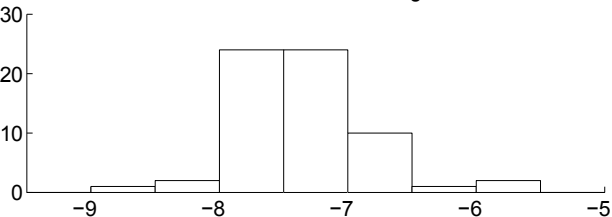

Branches longer than expected

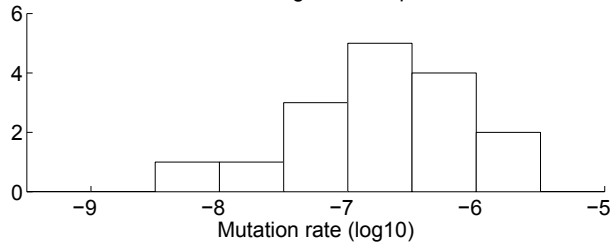

Supplement: S5 (10.1371/journal.pgen.1005072.s005) [file journal.pgen.1005072.s005.PDF]
