# Supplementary material for: The Role of China in the Global Spread of the Current Cholera Pandemic
Source: PLoS Genet. 2015 Mar 13;11(3):e1005072. doi: 10.1371/journal.pgen.1005072 (PMC4358972; doi:10.1371/journal.pgen.1005072)
Supplement: S3 Table — (XLSX) [file pgen.1005072.s008.xlsx]

## Sheet: Sheet1
Gene Sets	Strain	Site in N16961	Locus tag	Gene	Product	NT change*	Codon change	AA change	Type**
mutS, mutL, mutH and uvrD
	SN043	194707	VC0190	uvrD	DNA-dependent helicase II	C->T	CCG->CTG	P->L	NS
	SN087	195705	VC0190	uvrD	DNA-dependent helicase II	A->G	AAA->GAA	K->E	NS
	SN151	367157	VC0345	mutL	DNA mismatch repair protein MutL	A->G	GAG->GGG	E->G	NS
	SN071	367365	VC0345	mutL	DNA mismatch repair protein MutL	.->C	Frameshift	Multiple	FS
	SN039	368502	VC0345	mutL	DNA mismatch repair protein MutL	C->T	GTC->GTT	V->V	S
	SN043	565899	VC0535	mutS	DNA mismatch repair protein MutS	T->.	Frameshift	Multiple	FS
	SN151	566050	VC0535	mutS	DNA mismatch repair protein MutS	G->A	CCC->TCC	P->S	NS
	SN074	566382	VC0535	mutS	DNA mismatch repair protein MutS	.->A	Frameshift	Multiple	FS
	SN085	566541	VC0535	mutS	DNA mismatch repair protein MutS	.->CG	Frameshift	Multiple	FS
	SN010	567092	VC0535	mutS	DNA mismatch repair protein MutS	C->T	TGG->TGA	W->Stop Codon	Termination
	SN065	567508	VC0535	mutS	DNA mismatch repair protein MutS	A->.	Frameshift	Multiple	FS
	SN074	567611	VC0535	mutS	DNA mismatch repair protein MutS	T->C	CAA->CAG	Q->Q	S
	SN024	567622	VC0535	mutS	DNA mismatch repair protein MutS	.->C	Frameshift	Multiple	FS
	SN051	567694	VC0535	mutS	DNA mismatch repair protein MutS	.->CGCAGCAG	Frameshift	Multiple	FS
	SN059	568179	VC0535	mutS	DNA mismatch repair protein MutS	.->T	Frameshift	Multiple	FS
	SN075	715895	VC0668	mutH	DNA mismatch repair protein MutH	T->.	Frameshift	Multiple	FS
	SN052	716211	VC0668	mutH	DNA mismatch repair protein MutH	CA->.	Frameshift	Multiple	FS
	SN074	716470	VC0668	mutH	DNA mismatch repair protein MutH	C->T	GCC->ACC	A->T	NS
Other genes in mismatch repair system
	SN024	104396	VC0108	dpoI	DNA polymerase I	G->A	ATG->ATA	M->I	NS
	SN071	418536	VC0394	uvrA	excinuclease ABC subunit A	G->T	CTG->ATG	L->M	NS
	SN085	418605	VC0394	uvrA	excinuclease ABC subunit A	C->T	GTT->ATT	V->I	NS
	SN075	419109	VC0394	uvrA	excinuclease ABC subunit A	T->C	AAA->GAA	K->E	NS
	SN051	419157	VC0394	uvrA	excinuclease ABC subunit A	A->G	TTC->CTC	F->L	NS
	SN024	420431	VC0394	uvrA	excinuclease ABC subunit A	A->.	Frameshift	Multiple	FS
	SN043	818840	VC0766	xseA	exodeoxyribonuclease VII large subunit	C->T	AGC->AAC	S->N	NS
	SN085	950546	VC0891	xseB	exodeoxyribonuclease VII small subunit	C->T	GAA->AAA	E->K	NS
	SN052	1035572	VC0971	ligA	NAD-dependent DNA ligase LigA	A->G	AGT->GGT	S->G	NS
	SN151	1087844	VC1018	uvrB	excinuclease ABC subunit B	A->G	ACC->GCC	T->A	NS
	SN065	1291511	VC1214	uvrC	excinuclease ABC subunit C	A->T	GAT->GTT	D->V	NS
	SN059	1292829	VC1214	uvrC	excinuclease ABC subunit C	C->T	AGC->AGT	S->S	S
	SN024	1308097	VC1234	sbcB	exonuclease I	T->C	ATT->GTT	I->V	NS
	SN071	1369263	VC1290	dnaQ	DNA polymerase III subunit epsilon	G->A	CAG->TAG	Q->Stop Codon	Termination
	SN075	2397990	VC2245	dnaE	DNA polymerase III subunit alpha	G->A	AGC->AGT	S->S	S
	SN071	2401135	VC2245	dnaE	DNA polymerase III subunit alpha	G->A	CCA->CTA	P->L	NS
Note: * '.' indicates no nucleotide
** NS - Non-synonymous; S - Synonymous; Termination - Premature stop codon; FS - Frameshift
